# Supplementary material
Source: Springer Nature journal article supplement (https://www.springermedizin.de/resource/supplementary/12865_2013_576_MOESM5_ESM.pdf/9428276)

**A****HDM****IL-5**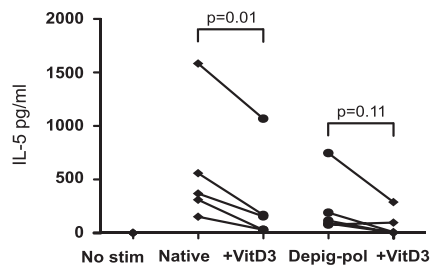**IFN- $\gamma$** 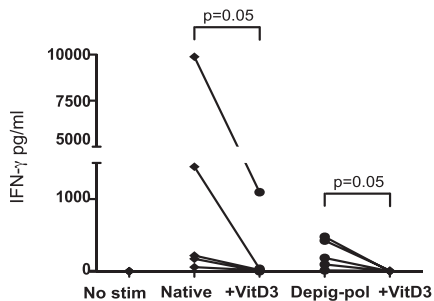**IL-17**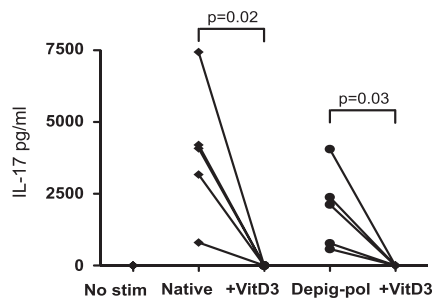**IL-10**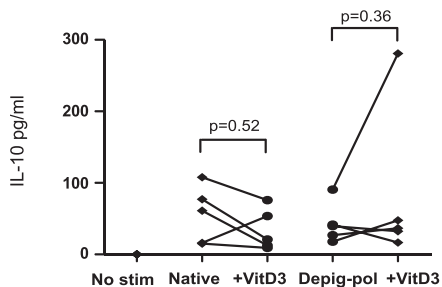**B****GRASS****IL-5**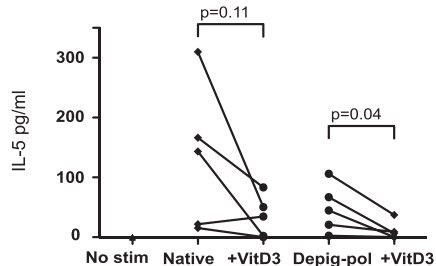**IFN- $\gamma$** 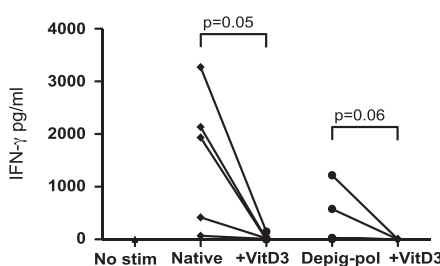**IL-17**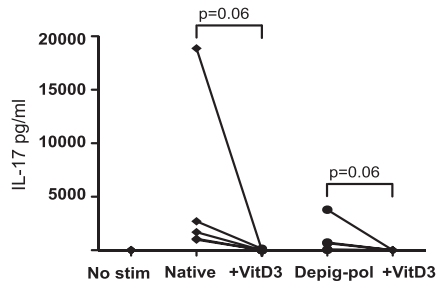**IL-10**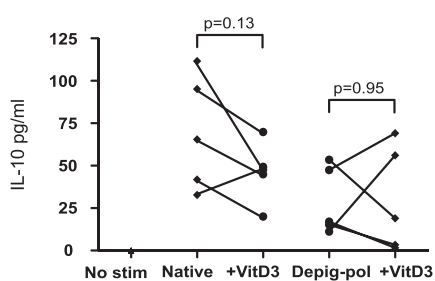

Supplement: MOESM5 [file 9428276]
